# Supplementary material
Source: MDPI journal article supplement (https://www.mdpi.com/2076-3417/9/22/4757)
Supplement: s1 [file s1]

## Supplementary material

**Table S1.** Primers and qPCR conditions for the determination of fungal and bacterial gene copy numbers.

| Primers                                      | qPCR conditions                                                                                                                                                                     | References |
|----------------------------------------------|-------------------------------------------------------------------------------------------------------------------------------------------------------------------------------------|------------|
| qPCR for total fungi: Fung5 F and FF390 R    | 15 min at 95 °C, 40 cycles of 30 s at 94 °C, 30 s at 52 °C and 60 s at 72 °C. For melting curve: 15 s at 95 °C, 60 s to 60 °C, 95 °C for 30 s and final extension of 15 s at 60 °C. | [33]       |
| qPCR for total bacteria: Ba519 F and Ba907 R | 15min at 95 °C, 40 cycles of 30 s at 94 °C, 30 s at 50 °C and 60 s at 72 °C. For melting curve: 15 s at 95 °C, 60 s to 60 °C, 95 °C for 30 s and final extension of 15 s at 60 °C.  | [34]       |

**Table S2.** Effect of treatments on metabarcoding (16S rRNA) diversity. Mean values (n=3) ± SD. Probability values from three-way ANOVA (ns: non-significant) for the effects of plant growth, bioaugmentation, amendment and their interactions are shown below. H': Shannon's index; S': Simpson's index; J': Pielou's evenness; rR: rarefied richness. Compost: amended with composted horse manure; Cow slurry: amended with dried cow slurry.

|                     |                  |            | H'        | S'          | J'         | rR       |
|---------------------|------------------|------------|-----------|-------------|------------|----------|
| <i>Brassica</i>     | Non-bioaugmented | Control    | 6.220±0.2 | 0.992±0.002 | 0.748±0.02 | 3800±160 |
|                     |                  | Compost    | 6.265±0.2 | 0.990±0.003 | 0.745±0.02 | 4129±211 |
|                     |                  | Cow slurry | 6.320±0.1 | 0.993±0.002 | 0.763±0.01 | 3672±117 |
|                     | Bioaugmented     | Control    | 6.114±0.2 | 0.992±0.002 | 0.737±0.02 | 3562±235 |
|                     |                  | Compost    | 6.258±0.0 | 0.989±0.000 | 0.740±0.00 | 4133±74  |
|                     |                  | Cow slurry | 6.340±0.2 | 0.993±0.002 | 0.760±0.01 | 3692±256 |
| Unplanted           | Non-bioaugmented | Control    | 6.165±0.1 | 0.992±0.002 | 0.740±0.02 | 3799±55  |
|                     |                  | Compost    | 6.220±0.2 | 0.990±0.004 | 0.741±0.03 | 4011±244 |
|                     |                  | Cow slurry | 6.459±0.1 | 0.995±0.000 | 0.777±0.01 | 3874±237 |
|                     | Bioaugmented     | Control    | 6.303±0.1 | 0.992±0.001 | 0.752±0.01 | 3923±137 |
|                     |                  | Compost    | 6.215±0.3 | 0.991±0.003 | 0.738±0.02 | 4050±270 |
|                     |                  | Cow slurry | 6.184±0.3 | 0.990±0.005 | 0.743±0.03 | 3762±198 |
| Plant (P)           |                  |            | ns        | ns          | ns         | ns       |
| Bioaugmentation (B) |                  |            | ns        | ns          | ns         | ns       |
| Amendment (A)       |                  |            | ns        | 0.007       | 0.021      | 0.000    |
| P x B               |                  |            | ns        | ns          | ns         | ns       |
| P x A               |                  |            | ns        | ns          | ns         | ns       |
| B x A               |                  |            | ns        | ns          | ns         | ns       |
| P x B x A           |                  |            | ns        | ns          | ns         | ns       |
